# Supplementary material for: Defective mitochondrial ISCs biogenesis switches on IRP1 to fine tune selective mitophagy
Source: PubMed Central journal article supplement — Redox Biol. 2020 Jul 27;36:101661. doi: 10.1016/j.redox.2020.101661 (PMC7426581; doi:10.1016/j.redox.2020.101661), 2020-07-27

**Fig. S1. ISCU knockdown induces mitophagy, which is independent on Parkin**

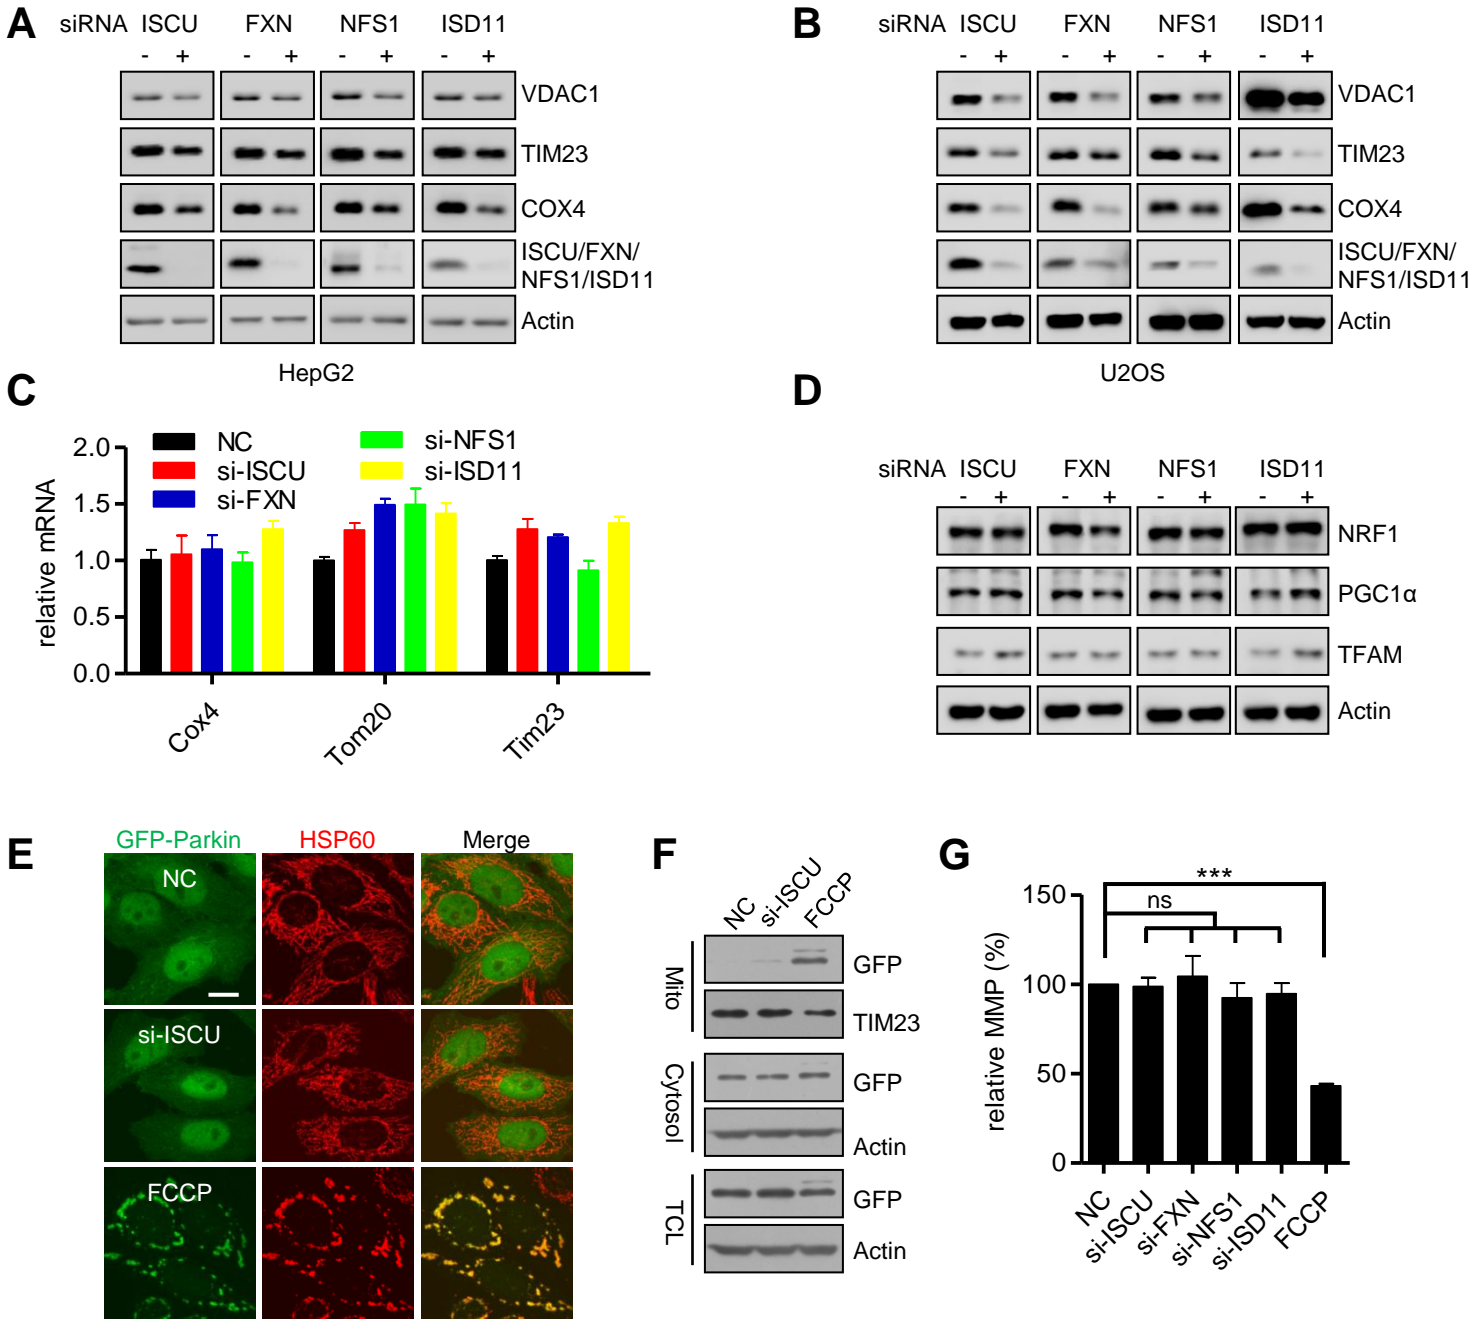

**Fig. S2.** IRP2 regulates mitophagy overlapping to IRP1

**A**

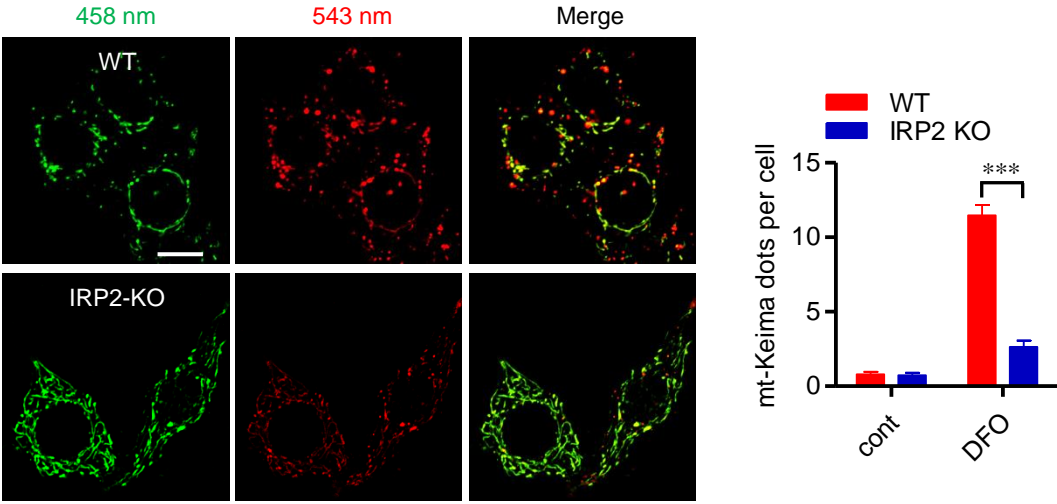

**B**

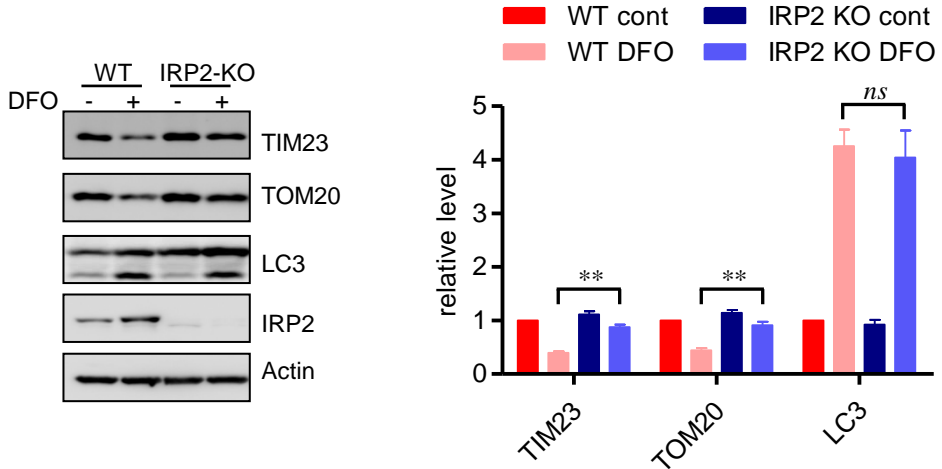

**Fig. S3.** The effect of IRP1 on general autophagy, Parkin mediated mitophagy and hypoxia induced mitophagy

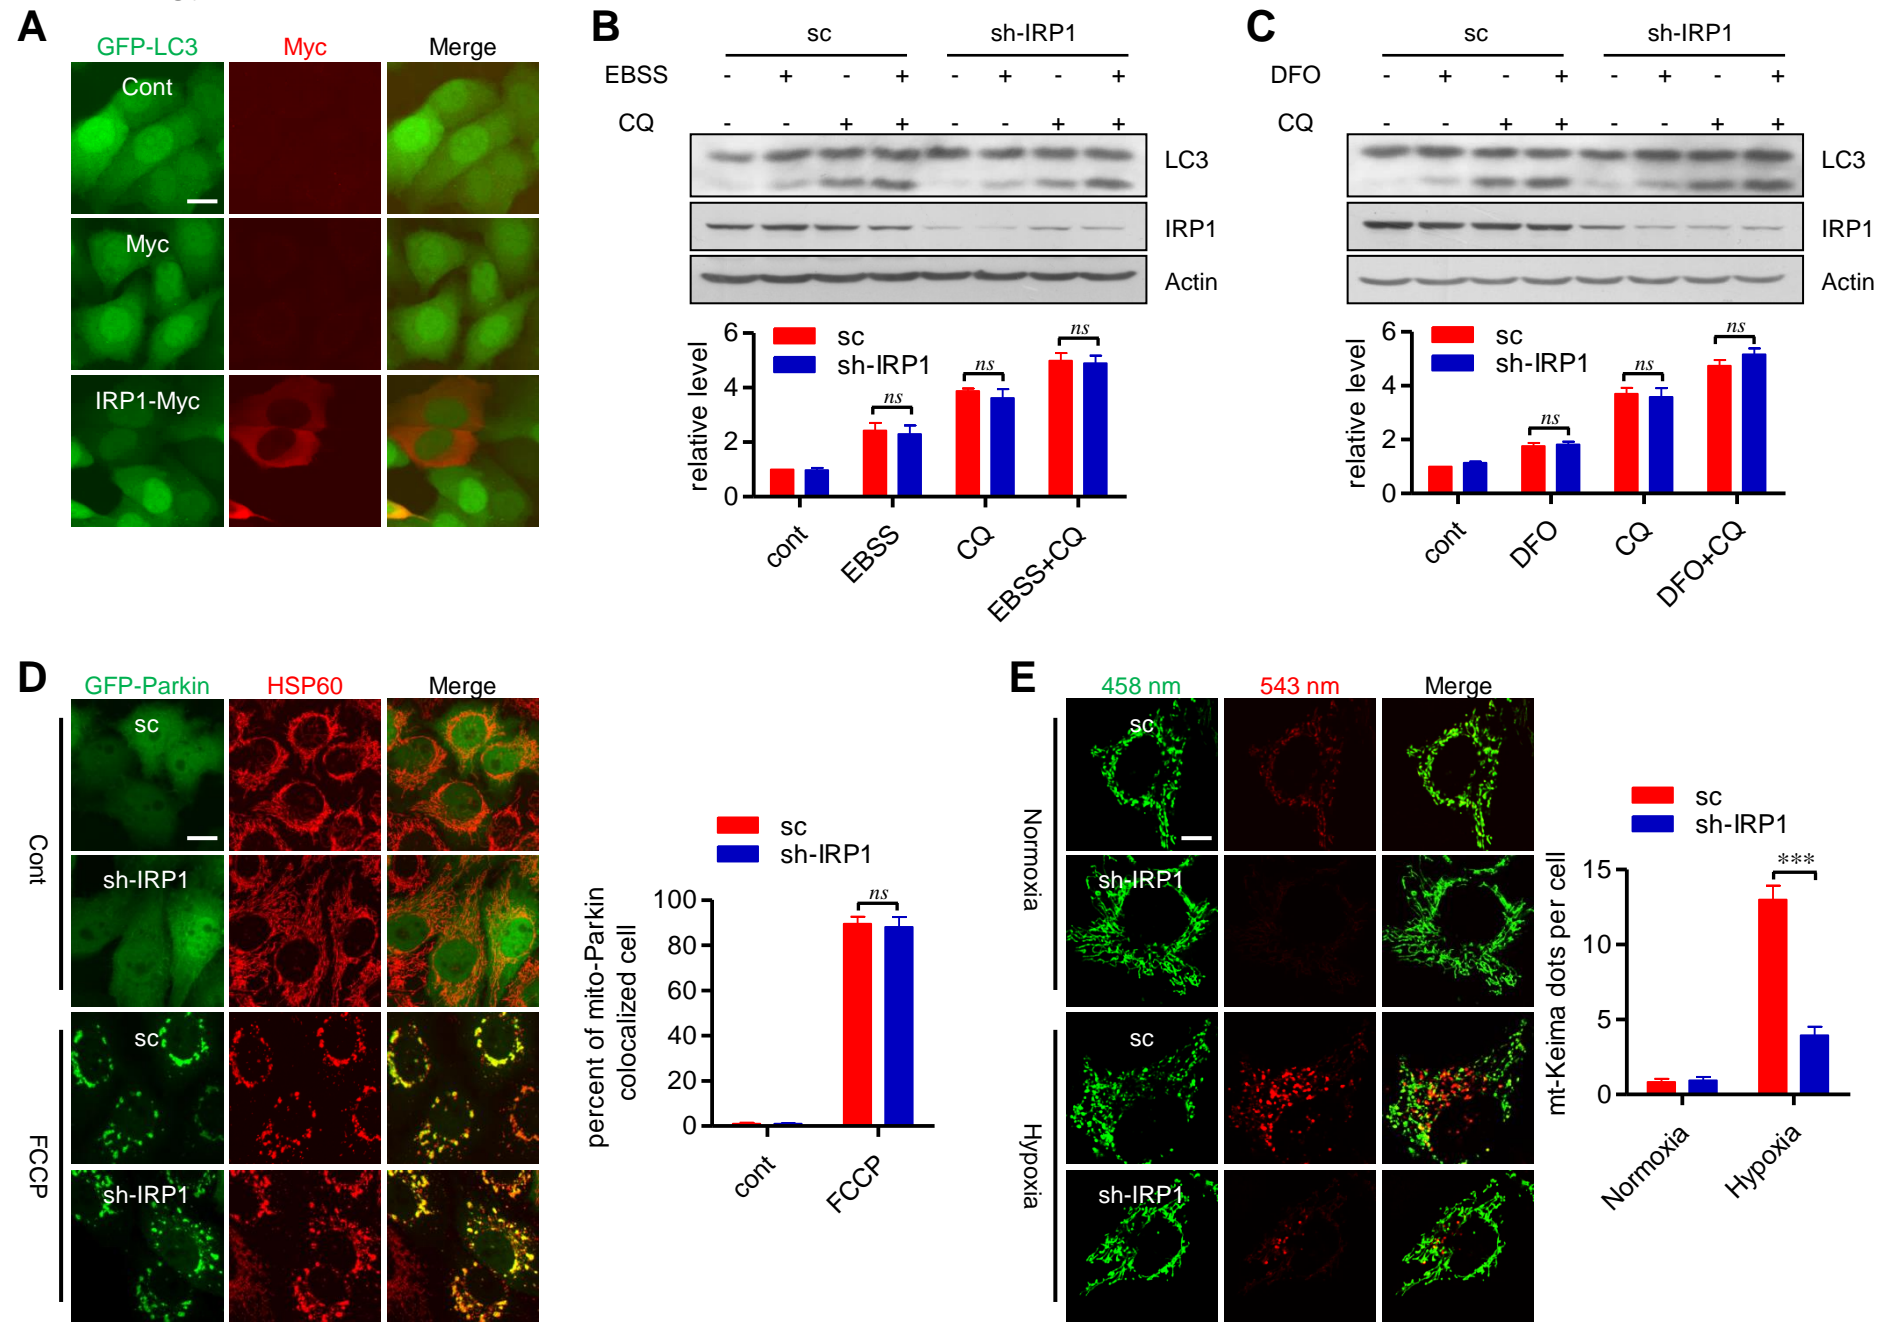

**Fig. S4. IRP1 modulates Bcl-xL translation**

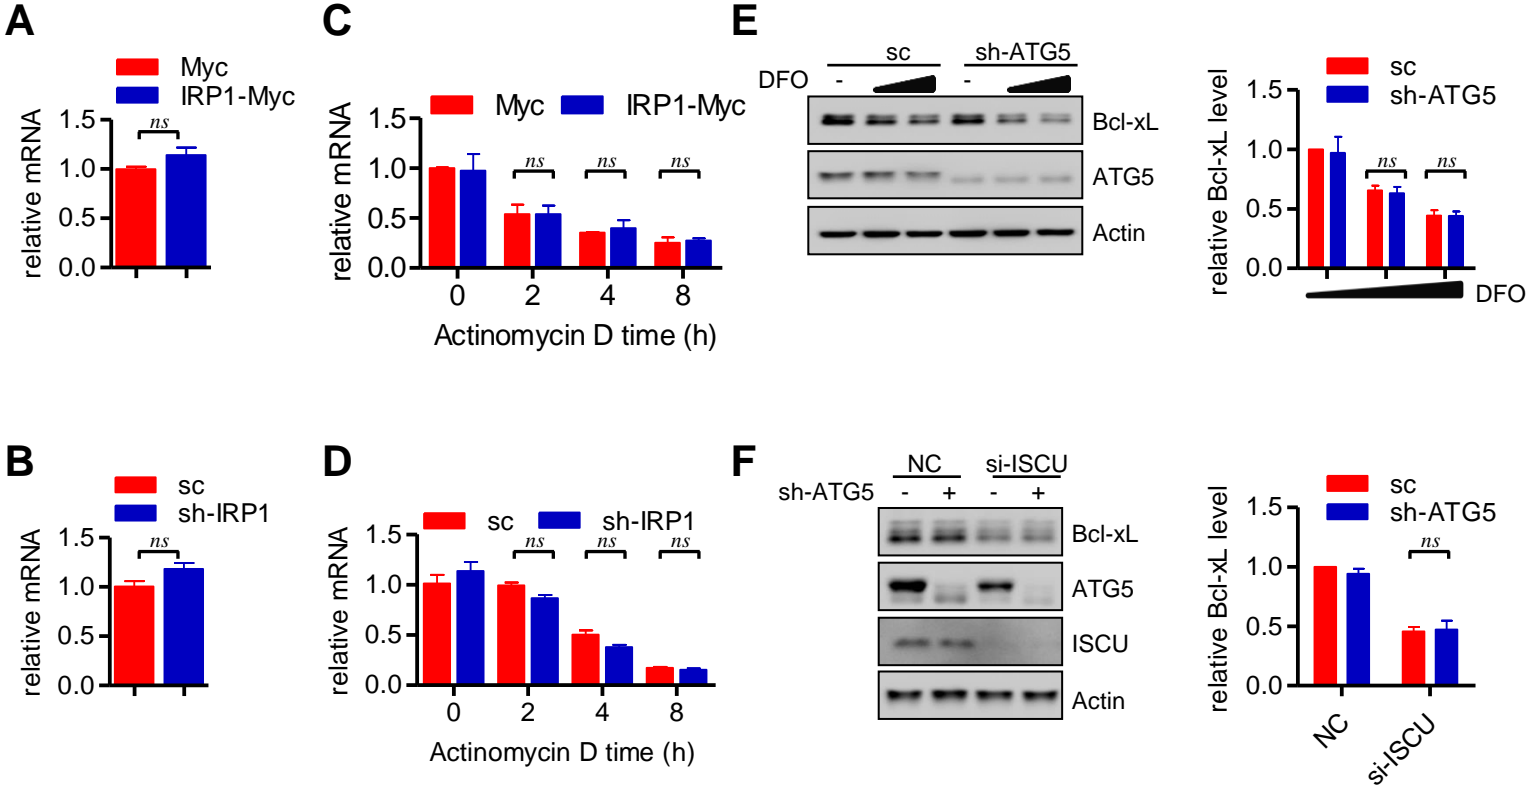

**Fig. S5.** FUNDC1 dependent mitophagy is crucial for mitochondrial quality control

**A**

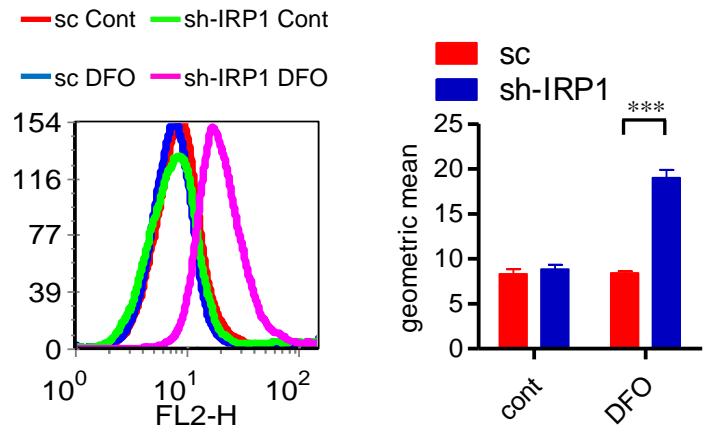

**C**

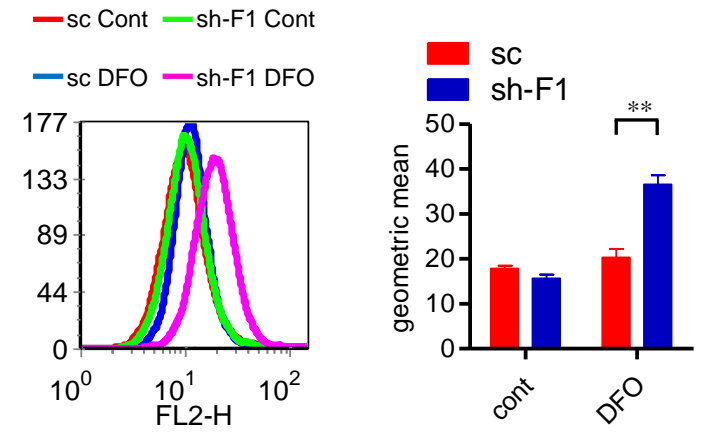

**B**

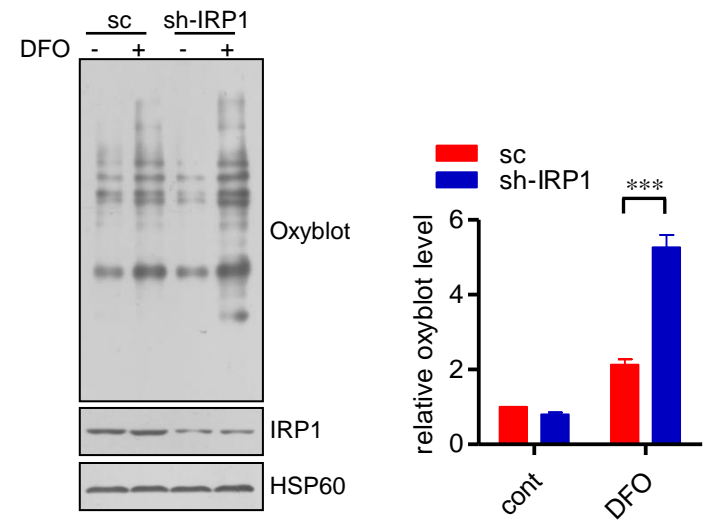

**D**

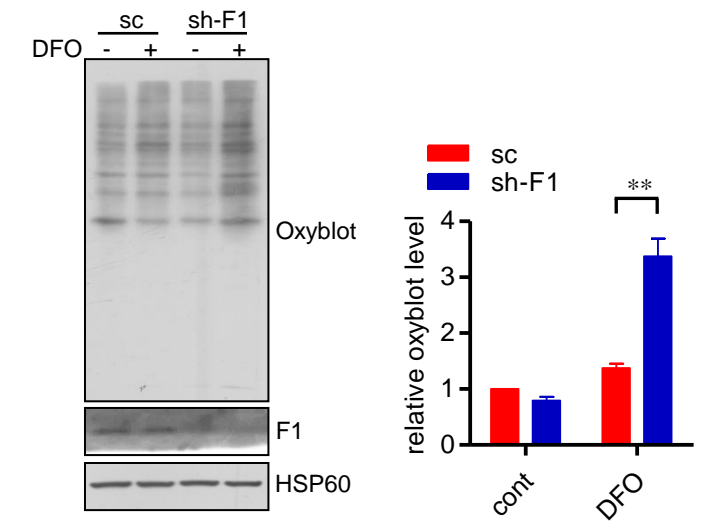

Supplement: mmc1.pdf [file mmc1.pdf]
